1

2 **Resting-State fMRI reveals Longitudinal Alterations in Brain Network**

3 **Connectivity in a Mouse Model of Huntington's Disease**

4

5 **Author list:** Tamara Vasilkovska<sup>1,2</sup>, Mohit H. Adhikari<sup>1,2</sup>, Johan Van Audekerke<sup>1,2</sup>, Dorian  
6 Pustina<sup>3</sup>, Roger Cachepe<sup>3</sup>, Haiying Tang<sup>3</sup>, Longbin Liu<sup>3</sup>, Ignacio Munoz-Sanjuan<sup>3</sup>, Annemie  
7 Van der Linden<sup>1,2</sup>, Marleen Verhoye<sup>1,2</sup>

8 **Authors affiliations:**

9 <sup>1</sup>Bio-Imaging Lab, University of Antwerp, Universiteitsplein 1, 2610 Wilrijk, Antwerp,  
10 Belgium

11 <sup>2</sup> $\mu$ NEURO Research Centre of Excellence, University of Antwerp, Antwerp, Belgium

12 <sup>3</sup>CHDI Management/CHDI Foundation, Princeton, New Jersey, USA

13

14 **Corresponding author:**

15 Tamara Vasilkovska, M.D., MSc

16 Bio-Imaging Lab, University of Antwerp, Universiteitsplein 1, 2610 Wilrijk, Antwerp,  
17 Belgium

18 e-mail: [tamara.vasilkovska@uantwerpen.be](mailto:tamara.vasilkovska@uantwerpen.be)

19

20 **Keywords:** Huntington's disease, functional connectivity, large-scale brain networks, resting-  
21 state fMRI, neurodegeneration

22

23

24 ABSTRACT

25

26 Huntington's disease is an autosomal, dominantly inherited neurodegenerative disease caused  
27 by an expansion of the CAG repeats in exon 1 of the huntingtin gene. Neuronal degeneration  
28 and dysfunction that precedes regional atrophy result in the impairment of striatal and cortical  
29 circuits that affect the brain's large-scale network functionality. However, the evolution of  
30 these disease-driven, large-scale connectivity alterations is still poorly understood.  
31 Here we used resting-state fMRI to investigate functional connectivity changes in a mouse  
32 model of Huntington's disease in several relevant brain networks and how they are affected at  
33 different ages that follow a disease-like phenotypic progression. Towards this, we used the  
34 heterozygous (HET) form of the zQ175DN Huntington's disease mouse model that  
35 recapitulates aspects of human disease pathology. Seed- and Region-based analyses were  
36 performed at different ages, on 3-, 6-, 10-, and 12-month-old HET and age-matched wild-type  
37 mice.

38 Our results demonstrate decreased connectivity starting at 6 months of age, most prominently  
39 in regions such as the retrosplenial and cingulate cortices, pertaining to the default mode-like  
40 network and auditory and visual cortices, part of the associative cortical network. At 12  
41 months, we observe a shift towards decreased connectivity in regions such as the  
42 somatosensory cortices, pertaining to the lateral cortical network, and the caudate putamen, a  
43 constituent of the subcortical network. Moreover, we assessed the impact of distinct  
44 Huntington's Disease-like pathology of the zQ175DN HET mice on age-dependent  
45 connectivity between different brain regions and networks where we demonstrate that  
46 connectivity strength follows a nonlinear, inverted U-shape pattern, a well-known phenomenon  
47 of development and normal aging. Conversely, the neuropathologically driven alteration of  
48 connectivity, especially in the default mode and associative cortical networks, showed  
49 diminished age-dependent evolution of functional connectivity.

50 These findings reveal that in this Huntington's disease model, altered connectivity starts with  
51 cortical network aberrations which precede striatal connectivity changes, which appear only at  
52 a later age. Taken together, these results suggest that the age-dependent cortical network  
53 dysfunction seen in rodents could represent a relevant pathological process in Huntington's  
54 disease progression.

55

## 56 INTRODUCTION

57

58 Huntington's disease is the most prevalent monogenic neurodegenerative disease with an  
59 autosomal, dominantly inherited nature.<sup>1,2</sup> Typically, it develops in young to middle-aged  
60 adults and is distinguished by a triad of progressively deteriorating cognitive, psychiatric, and  
61 motor signs and symptoms. The origin of Huntington's disease lies in the abnormal expansion  
62 of the CAG repeat above 39 in the huntingtin gene.<sup>3</sup> This results in a mutated form of the  
63 huntingtin protein (mHTT) that contains the expanded polyglutamine (polyQ) stretch. The  
64 prevailing hypothesis is that the mHTT protein exhibits toxic gain-of-function properties that  
65 lead to dysfunction and subsequent death of neurons.<sup>4</sup> Vulnerable to this process are basal  
66 ganglia structures, especially the striatum and its medium spiny neuron.<sup>4</sup> However, prominent  
67 changes in cortical pathology have been reported, both in anatomy and function, that shed light  
68 on the diversity of the Huntington's disease symptomatology.<sup>5-9</sup> Before brain atrophy occurs,  
69 neuronal properties on the level of both the synapse and circuitry already undergo alterations  
70 preceding clinical motor diagnosis.<sup>10-12</sup> Despite the known genetic background of Huntington's  
71 disease, there is no successful disease-modifying therapy thus far. Towards a better  
72 understanding of the disease progression and finding an effective therapeutic strategy, several  
73 imaging modalities that hold the potential of biomarkers have been used in both clinical and  
74 preclinical research.<sup>13-15</sup>

75 One promising imaging modality is resting-state functional MRI (rsfMRI) that measures  
76 changes in the blood oxygen level-dependent (BOLD) signal, which indirectly reflects  
77 neuronal activity while the brain is at rest. Spontaneous fluctuations in the low frequency (0.01  
78 – 0.1Hz) BOLD signal contain information about the connectivity between distinct brain  
79 regions and reveal the brain's functional architecture, organized in resting-state networks  
80 (RSN).<sup>16,17</sup> Network alterations have already been shown to intersect with neuropathological  
81 findings and also to precede and follow clinical manifestation in other neurodegenerative  
82 diseases, such as Alzheimer's and Parkinson's diseases.<sup>18,19</sup> In people with Huntington's  
83 disease (PwHD), cross-sectional rsfMRI studies have revealed heterogeneous alterations in  
84 different relevant RSNs before and after clinical motor diagnosis.<sup>20</sup> Most prominent changes  
85 are consistently present in the sensory-motor network in PwHD, the visual, default mode,  
86 subcortical, and executive networks are mainly affected after clinical diagnosis, however, some  
87 studies also report no significant changes in either pre- or different stages post-clinical motor  
88 diagnosis.<sup>11,21,22</sup> Although these clinical findings help describe the course of Huntington's

89 disease and have the potential to be used in future therapeutic strategies, conflicting evidence  
90 suggests the need for a longitudinal study to understand the evolution of functional connectivity  
91 (FC) alterations of these networks consequential to the development and progression of  
92 Huntington's disease.

93 Studies in rodent models of Huntington's disease have affirmed the relevance of both the  
94 cortical and striatal networks where neuronal activity impairments are present in both the  
95 cortical projection and medium spiny neurons across ages.<sup>23-27</sup> Cortical circuitry alterations in  
96 Huntington's disease have been gaining more attention where electrophysiological findings  
97 have shown that, under sensory stimulation, cortical areas such as the motor and sensory cortex  
98 demonstrate aberrant activity in early manifest states.<sup>25,26</sup> However, whole-brain functional  
99 connectivity changes in rodent models have not been well investigated, hence the lack of  
100 assessment of the macroscopic network alterations along the Huntington's disease-like  
101 phenotype progression.

102 Here we aimed to assess the changes in resting-state network FC using the knock-in zQ175  
103 delta-neo (DN) heterozygous (HET) mouse model of Huntington's Disease, which exhibits  
104 cellular, behavioral and cognitive abnormalities, where motor alterations follow temporal  
105 progression from 6 months onwards.<sup>28-30</sup> We acquired rsfMRI and assessed FC at four different  
106 ages: 3, 6, 10 and 12 months, in the zQ175DN HET, and age-matched wild-type (WT) mice.  
107 We hypothesized that connectivity changes in the large-scale brain networks, especially  
108 involving the striatum, are altered at an early age in the zQ175DN HET mice. Moreover, we  
109 hypothesized that the already established mHTT progressive accumulation<sup>30</sup> leads to  
110 continuous worsening in the cortico-cortical and cortico-striatal connectivity of the zQ175DN  
111 HET mice.<sup>30</sup>

112

## 113 MATERIALS & METHODS

114

### 115 Animals

116 Two cohorts of male, age-matched, WT and HET (cohort 1: WT ( $n = 18$ ), HET ( $n = 19$ ); cohort  
117 2 WT ( $n = 16$ ), HET ( $n = 19$ )) zQ175DN KI littermates (C57BL/6J background, CHDI-  
118 81003019, JAX stock #029928) were obtained from the Jackson Laboratory (Bar Harbor, ME,  
119 USA). Animals were single-housed in individually ventilated cages with food and water *ad*  
120 *libitum* and continuous monitoring for temperature and humidity under a 12h light/dark cycle.

121 The animals were kept in the animal facility for at least a week to acclimatize to the current  
122 conditions before the experimental procedures. All experiments and handling were done in  
123 accordance with the EU legislation regulations (EU directive 2010/63/EU) and were approved  
124 by the Ethical Committee for Animal Testing UAntwerp (ECD # 2017-09).

125 The zQ175DN KI (without a floxed neomycin cassette) mouse model has the human HTT exon  
126 1 substitute for the mouse *Htt* exon 1 with ~180-220 CAG repeats long tract. This model is a  
127 modified version of the zQ175 KI<sup>28</sup> where the congenic C57BL6J is used as the strain  
128 background.<sup>31</sup> The first motor deficits are observed at 6 months, marked as an onset of  
129 phenoconversion.<sup>29</sup> The HET form of zQ175DN has a slow progression reflected in the  
130 increase of mHTT aggregation from 3 until 12 months, initially appearing in the striatum at 3  
131 and later on in the cortex at 8 months of age.<sup>30</sup> A longitudinal rsfMRI study was performed in  
132 the first cohort, in both the zQ175DN HET and their age-matched WTs<sup>32</sup>, at different ages  
133 following Huntington's disease-like phenotypic progression: 3, 6 and 10 months. rsfMRI data  
134 in the second cohort were obtained at 12 months of age.

#### 135 rsfMRI acquisition

136 MRI scans were acquired on a 9.4 T Biospec system with a four-element receive-only mouse  
137 head cryoprobe coil (Bruker Biospin MRI, Ettlingen, Germany) and a volume resonator for  
138 transmission. Prior to the whole-brain rsfMRI scan, a B<sub>0</sub> field map was acquired to measure  
139 the magnetic field inhomogeneities after which local shimming was performed within an  
140 ellipsoid volume, covering the middle portion of the brain. The dynamic BOLD resting-state  
141 signals were measured with a T<sub>2</sub>\*-weighted single-shot Echo-Planar Imaging (EPI) sequence  
142 (field of view (FOV) (27x21) mm<sup>2</sup>, matrix dimensions (MD) [90x70], 12 horizontal slices of  
143 0.4mm, voxel dimensions (300x300x400) μm<sup>3</sup>, flip angle 60°, TR 500ms, TE 15ms, 1200  
144 repetitions). After the rsfMRI scan was acquired, a 3D anatomical scan was obtained using the  
145 3D Rapid Acquisition with Refocused Echoes (RARE) sequence with FOV (20x20x10) mm<sup>3</sup>,  
146 MD [256x256], 128 horizontal slices of 0.3mm, (78x78x78) μm<sup>3</sup>, TR 1800ms, TE 42ms, pixel  
147 dimensions.

148 During rsfMRI scans, mice were initially anesthetized with 2% isoflurane (Isoflo®, Abbot  
149 Laboratories Ltd., USA) in a mixture of 200ml/min O<sub>2</sub> and 400ml/min N<sub>2</sub>. After the animal  
150 was stabilized, a subcutaneous bolus injection of medetomidine (0.075 mg/kg; Domitor, Pfizer,  
151 Karlsruhe, Germany) was applied followed by a gradual decrease to 0.5% isoflurane over the  
152 course of 30 minutes which was kept at this level throughout the whole experiment.

153 Meanwhile, a continuous infusion of medetomidine (0.15 mg/kg/h), starting 10 minus post  
154 bolus medetomidine injection, was applied in combination with the isoflurane, an established  
155 protocol for rsfMRI in rodents.<sup>33,34</sup> Throughout the duration of the experiment, all  
156 physiological parameters (breathing rate, heart rate, O<sub>2</sub> saturation, and body temperature) were  
157 kept under normal conditions.

#### 158 rsfMRI image preprocessing

159 rsfMRI repetitions for each session were realigned to the first image with a 6-parameter rigid-  
160 body spatial transformation estimated with the least-squares approach. Next, a study-based  
161 template was generated. To create an unbiased template, in cohort 1, we used the individual  
162 3D RARE images from 1/2 of each group from each time point. In cohort 2, all 3D RARE  
163 images from both groups were used to generate the study template. The rsfMRI data were co-  
164 registered to their respective subject 3D RARE image. The 3D RARE images were normalized  
165 to the common study template. Spatial transformation parameters were also estimated between  
166 the study-based template and an in-house C57BL/6 mouse brain atlas. All the rsfMRI data were  
167 spatially normalized to the in-house C57BL/6 atlas, combining all estimated transformation  
168 parameters: (1) rsfMRI to 3D RARE, (2) 3D RARE to common study template, and (3)  
169 common study template to in-house C57BL/6 atlas. In-plane smoothing was applied using a  
170 Gaussian kernel with full width at half maximum of twice the voxel size followed by motion  
171 vector regression based on the parameters generated during realignment. These steps were  
172 performed using Statistical Parametric Mapping (SPM) using SPM12 (Wellcome Centre for  
173 Human Neuroimaging, London, UK). Using a whole-brain mask, images were further filtered  
174 (0.01-0.2Hz) with a Butterworth band-pass filter where five repetitions from both the beginning  
175 and the end of the image series were removed before and after filtering to eliminate transient  
176 effects. Finally, quadratic detrending (QDT), voxel-wise global signal regression (GSR), and  
177 normalization to unit variance were applied. All analysis steps were performed with MATLAB  
178 R2021a (Mathworks, Natick, MA) and template creation was done using Advanced  
179 Normalization Tools (ANTs).

## 180 Functional connectivity (FC) analysis

181 To assess FC, we performed connectivity analysis on three different levels: Region of Interest  
182 (ROI)-, network- and seed-based FC. ROI-based FC was performed on selected ROIs that  
183 pertain to four different networks: the Default Mode-like Network (DMLN), associative  
184 cortical network (ACN), Lateral Cortical Network (LCN), and the Subcortical Network  
185 (SuCN). The network-based FC was carried out by pooling the FCs of ROI pairs that belong  
186 to the specific networks (within-network FC) or a pair of networks (between-network FC).  
187 Moreover, to investigate the brain-wide functional topography, we further performed seed-  
188 based FC analysis, where we used several representative regions from each network to evaluate  
189 the connectivity of each seed with the rest of the brain.

## 190 ROI- and network-based FC

191 We selected 26 unilateral ROIs (both left (L) and right (R) hemispheres for each region) from  
192 an in-house C57BL6 mouse atlas<sup>35</sup> that represent the main hubs of several relevant large-scale  
193 networks.<sup>36,37</sup> The abbreviations for each region are presented in Table 1. For each subject and  
194 each region, we extracted the time series of the region-averaged BOLD signal. Pearson  
195 correlation coefficients were calculated between the BOLD signal time series of each pair of  
196 regions. These correlations were Fisher z-transformed, thus obtaining subject-wise FC  
197 matrices. FC within each brain network was calculated by averaging the pairwise correlations  
198 between the regions of that network. Similarly, between-network FC was calculated by  
199 averaging correlations between the regions of each network. All the above scores were  
200 computed for each subject individually at each age.

## 201 Seed-based FC

202 Seeds (4x4x1 voxels) were drawn at the center of representative regions that pertain to the four  
203 large-scale networks. Seeds were drawn on the left hemisphere regions using the atlas  
204 parcellation to guide their placement. The selected regions were representative of each of the  
205 large-scale networks (Table 1). The BOLD signal time series were extracted for each seed and  
206 used in the multiple regression model of the BOLD signal time series of every voxel, thus  
207 producing seed-specific individual FC maps.



208

209

210

211

212

213

214

215

216

217

218

219 [Statistical analysis](#)

220 For ROI- and network-based FC, significant connections within each group (One-sample T-  
221 test,  $p \leq 0.05$ , False Discovery Rate (FDR) corrected) were identified, and between-group FC  
222 differences were tested for FC pairs found to be significantly different in at least one of the  
223 groups (Two-sample T-test, FDR corrected,  $p \leq 0.05$ ). ROI- and network-based FC statistics  
224 were performed in MATLAB R2021a. For Seed-based FC, group-level seed-based FC maps  
225 were generated for both the WT and HET group (One-sample T-test, FDR corrected,  $p \leq 0.05$ ,  
226 cluster size ( $k \geq 10$ )). A union of the group-level masks of voxels which are statistically  
227 significantly correlated with the seed region was applied when calculating between-group  
228 differences for each age (Two-sample T-test, FDR corrected,  $p \leq 0.05$ ,  $k \geq 10$ ) so that only voxels  
229 correlating with the seed region in WT and/or in HET were analyzed. Voxel-level statistics for  
230 the seed-based analysis was performed using SPM12. For visual representation, the T-statistics  
231 were upsampled and transferred onto the high-resolution Australian mouse brain MRI  
232 anatomical image<sup>38</sup>. These visualizations were produced with MRICroGL (McCausland Center  
233 for Brain Imaging, University of South Carolina, USA).

234 In cohort 1, a longitudinal assessment of changes in FC for selected ROI pairs as well as within  
235 and between networks was performed using a Linear Mixed Model (LMM) in JMP<sup>®</sup> (Version  
236 16, SAS Institute Inc., Cary, NC, 1989 – 2021). We set age, genotype, and age\*genotype  
237 interaction as fixed effects in the LMM and added a random slope model with the subject as a  
238 random intercept and age as a random slope. In the case when no significant age\*genotype

| Network                            | Region                                 |
|------------------------------------|----------------------------------------|
| Default Mode-Like Network (DMLN)   | CgCtx Cingulate cortex                 |
|                                    | RspCtx Retrosplenial cortex            |
|                                    | PrlCtx Prelimbic cortex                |
| Associative Cortical Network (ACN) | VCtx Visual cortex                     |
|                                    | AuCtx Auditory cortex                  |
| Lateral Cortical Network (LCN)     | S1Ctx Somatosensory cortex 1           |
|                                    | S2Ctx Somatosensory cortex 2           |
|                                    | MCtx Motor cortex                      |
|                                    | InsCtx Insular Cortex                  |
|                                    | FrACtx Frontal Association Cortex      |
| Subcortical Network (SuCN)         | mCPu Caudate Putamen, medial division  |
|                                    | ICPu Caudate Putamen, lateral division |
|                                    | PirCtx Piriform cortex                 |

**Table 1. Brain regions and Network abbreviations**



239 interaction was present, the interaction was removed from the LMM and the model was  
240 recalculated using genotype and age and those p values are reported. A posthoc test was further  
241 applied using Tukey honestly significant difference (HSD) with  $p \leq 0.05$ . Graphical  
242 representation of the data was obtained using GraphPad Prism (version 9.2.0 for Windows,  
243 GraphPad Software, San Diego, California USA, [www.graphpad.com](http://www.graphpad.com)). All data are  
244 represented with an interquartile range plot and subject values.

245

## 246 DATA AVAILABILITY

247 The in-house C57BL6 mouse atlas used in this study is publicly available  
248 <https://www.uantwerpen.be/en/research-groups/bio-imaging-lab/research/mri-atlases/c57bl6/>.  
249 The data that support the findings of this study are available from the corresponding author  
250 upon reasonable request.

251

252

## 253 RESULTS

254

### 255 **Reduced FC within DMLN and ACN regions at 6 but not 3 months of age**

256 At 3 months, in both groups, positive inter-hemispheric connectivity between homologous  
257 regions within all four networks was present (Fig. 1A). In addition, a positive correlation was  
258 also found between regions of the DMLN and ACN, while a negative correlation of regions  
259 pertaining to these two networks with LCN regions was observed. Moreover, the ICPu was  
260 positively correlated with S1Ctx and S2Ctx from the LCN while negatively correlated with  
261 regions of the DMLN and ACN. Genotype comparison showed no significant differences at  
262 this premanifest state ( $p > 0.05$ , FDR corrected, Fig. 1B). At 6 months, in both WT and  
263 zQ175DN HET, inter- and intrahemispheric positive FC was present in each network (Fig. 1C).  
264 Moreover, the positive FC between regions of the DMLN and ACN and between LCN and  
265 SuCN, as well as the anti-correlations of these network region pairs, persisted as observed at 3  
266 months. Between-group comparison revealed significantly decreased connectivity in the  
267 zQ175DN HET mice ( $p \leq 0.05$ , FDR corrected, Fig. 1D) in several pairs of regions within the  
268 DMLN: RspCtx (L - R), RspCtx (L&R) – CgCtx (L), PrlCtx (R) – RspCtx (L&R), in the ACN:

269 VCtx (L – R), VCtx (L) – AuCtx (L) and between DMLN and ACN: AuCtx (L) – CgCtx  
 270 (L&R), AuCtx (L) – RspCtx (L&R).

271

272

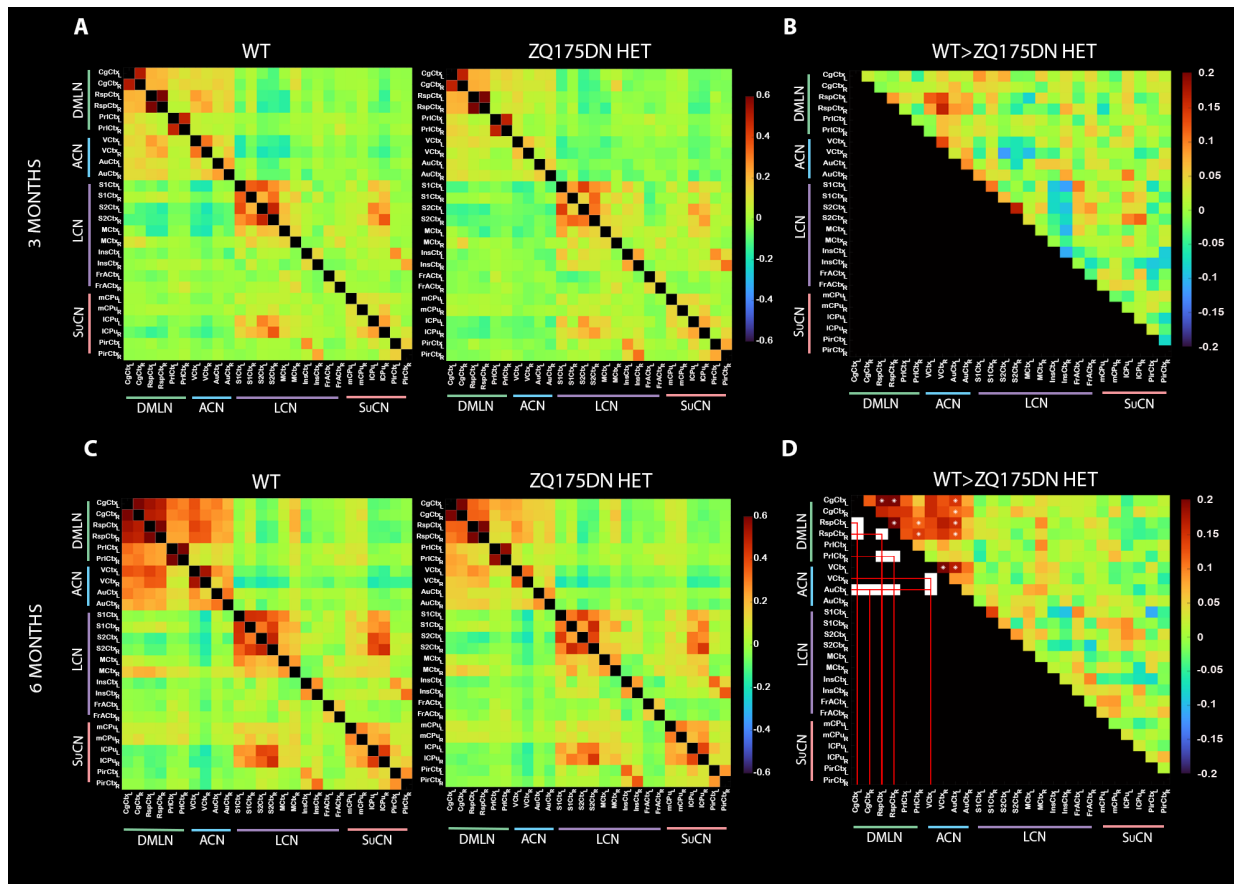

273

274 **Figure 1.** ROI-based FC shows decreased connectivity within and between DMLN and ACN  
 275 regions in the zQ175DN HET at 6 months of age. (A, C) Mean z-transformed correlation (mirrored)  
 276 matrices of each group at 3 (top row) and 6 months of age (bottom row); red/orange colors represent  
 277 positively correlated connectivity, green color indicates very low to no connectivity between regions,  
 278 and dark/light blue colors represent negatively correlated connectivity. (B, D) The upper triangle shows  
 279 the FC differences between groups for 3 and 6 months of age, respectively. Red/orange represents  
 280 positive or higher negative FC between a pair of regions in the zQ175DN HET compared to WT while  
 281 dark/light blue represents higher positive or lower negative FC in the zQ175DN HET compared to WT.  
 282 White squares in the lower triangle and asterisk in the upper triangle indicate significant group  
 283 differences in FC based on a two-sample T-test ( $p \leq 0.05$ , FDR corrected) only performed on  
 284 connections that demonstrated a significant FC in at least one group based on a one-sample T-test.

285

286 **Decreased connectivity in LCN and SuCN regions at 10 months of age**

287 At 10 months, in both WT and HET, within all four networks, there was a positive FC within  
288 each pair of regions (Fig. 2A). Moreover, a continued positive FC of DMLN regions with ACN  
289 regions and with regions from the LCN with the SuCN, was observed as it was in other ages  
290 (Fig. 1). Inter-genotype comparisons showed a significant decrease in FC in the zQ175DN  
291 HET mice between PrL (L – R) and AuCtx (R) – VCtx (R) ( $p \leq 0.05$ , FDR corrected, Fig. 2B).  
292 At 12 months, besides the positive FC within and between regions of the DMLN, ACN and  
293 SuCN in both groups, in the LCN, there was no interhemispheric FC present in the S1Ctx and  
294 S2Ctx (Fig. 2C). This was reflected in a positive intrahemispheric FC of these with all other  
295 regions of LCN, but no interhemispheric FC was observed. Interestingly, despite the positive  
296 homotopic FC for mCPu and lCPu of the SuCN, both regions showed only positive  
297 intrahemispheric correlations with the other regions of SuCN. Notably, the zQ175DN HET  
298 showed a significantly decreased interhemispheric FC between RspCtx (L – R), AuCtx (L –  
299 R), S2Ctx (L – R), InsCtx (L) – S2Ctx (R), lCPu (L) – InsCtx (R), lCPu (R) – InsCtx (L) and  
300 intrahemispheric lCPu (R) – PirCtx (R) ( $p \leq 0.05$ , FDR corrected, Fig. 2D). Besides the overall  
301 decrease in the positively correlated pairs, at this age, there was also a significant decrease in  
302 the zQ175DN HET in the negative FC between MCtx (L) – VCtx (R).

303

304

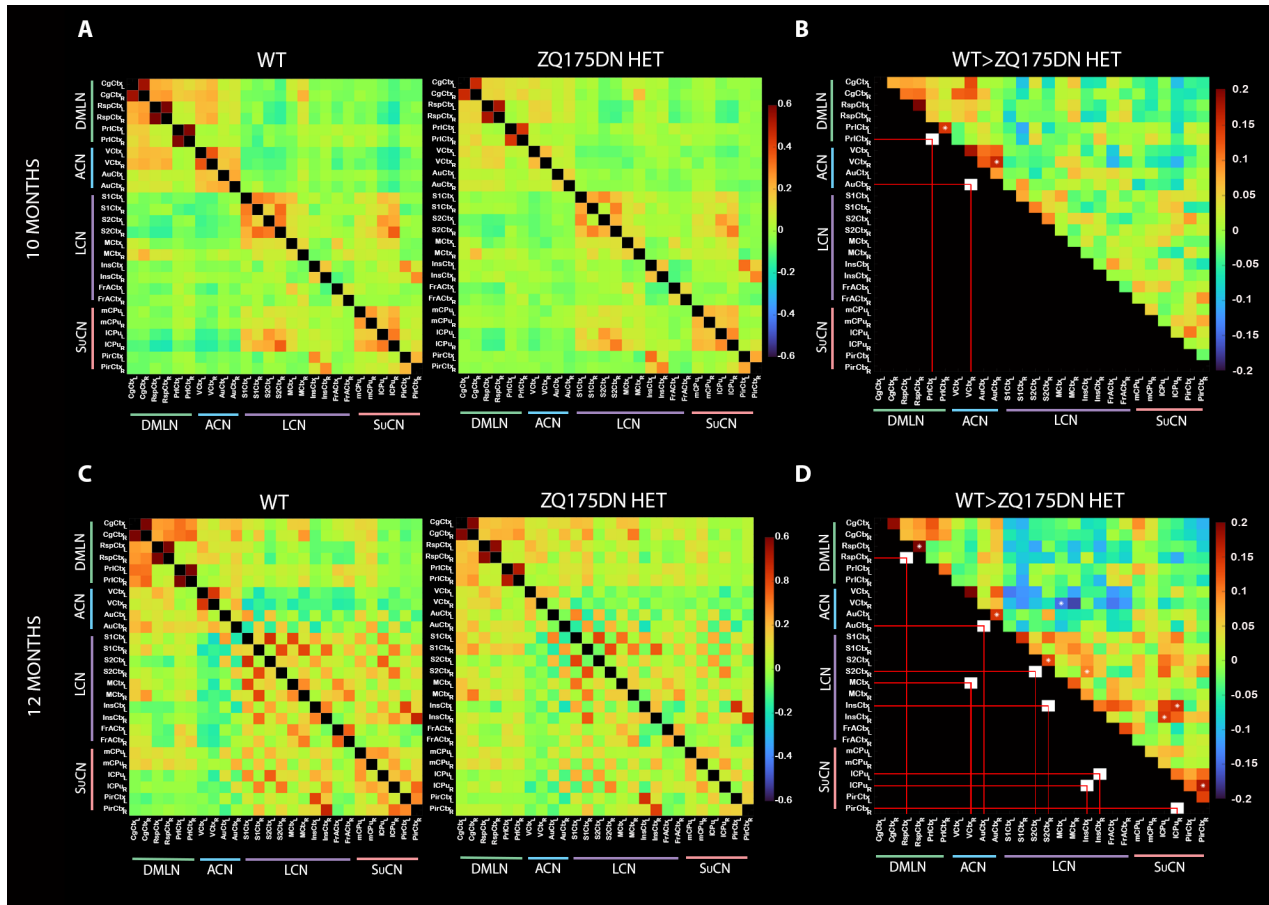

305

306 **Figure 2. Reduced FC in brain networks at 10 and 12 months of age in the zQ175DN HET mice.**

307 (A, C) Mean z-transformed correlation (mirrored) matrices of each group at 10 (top row) and 12 months  
 308 of age (bottom row); red/orange colors represent positively correlated connectivity, green color  
 309 indicates very low to no connectivity between regions and dark/light blue colors represent negatively  
 310 correlated connectivity (B, D) Upper triangle shows the between-group FC differences for 10 and 12  
 311 months of age, respectively. Red/orange represents lower positive or higher negative FC between a pair  
 312 of regions in the zQ175DN HET compared to WT while dark/light blue represents higher positive or  
 313 lower negative FC in the zQ175DN HET compared to WT. White squares in the lower triangle and  
 314 asterisk in the upper triangle indicate significant group differences in FC based on a two-sample T-test  
 315 ( $p \leq 0.05$ , FDR corrected) only performed on connections that demonstrated a significant FC in at least  
 316 one group based on a one-sample T-test.

317

318 **Decrease in cortical and hippocampal connectivity at 6 months of age**

319 Seed-based connectivity maps for each selected seed were obtained for both groups at each  
 320 age, however, we found significant inter-genotype difference only at 6 months (Fig. 3),

321 whereas for 3, 10, and 12 months we found no significant FC difference for any of the seeds  
322 (data not shown).

323 At 6 months, using seed-based analysis, we obtained voxel-wise connectivity maps in both  
324 groups for several seeds that are pertaining to DMLN, ACN, LCN, and SuCN. As part of the  
325 DMLN, both the RspCtx and the CgCtx seeds showed positive FC with other DMLN  
326 constituents as well as with the dentate gyrus (DG), medial orbital cortex (MO), Infralimbic  
327 Cortex (IL), Lateral septal nucleus (LS), and Olfactory Area (OA), while a negative FC with  
328 the cerebellum (CB) and medulla (MY) was present (Fig. 3A). Inter-group comparison showed,  
329 in the zQ175DN HET mice, decreased FC of the RspCtx with the positively correlated regions,  
330 while the decreased FC of the CgCtx seed was only with the HC (Fig. 3B). The VCtx seed,  
331 part of the ACN, was positively correlated with the contralateral VCtx and with RspCtx,  
332 CgCtx, MCtx, HC, and LS while negatively correlated with some portions of S1Ctx (Fig. 3A).  
333 A significantly decreased FC in the zQ175DN HET of VCtx with HC, RspCtx, contralateral  
334 VCtx, LS, and the perirhinal cortex was observed (Fig. 3B). However, seeds in S1Ctx and  
335 MCtx as part of LCN and the CPu from SuCN (Fig. 3A) showed no significant difference in  
336 FC between genotypes (Fig. 3B).

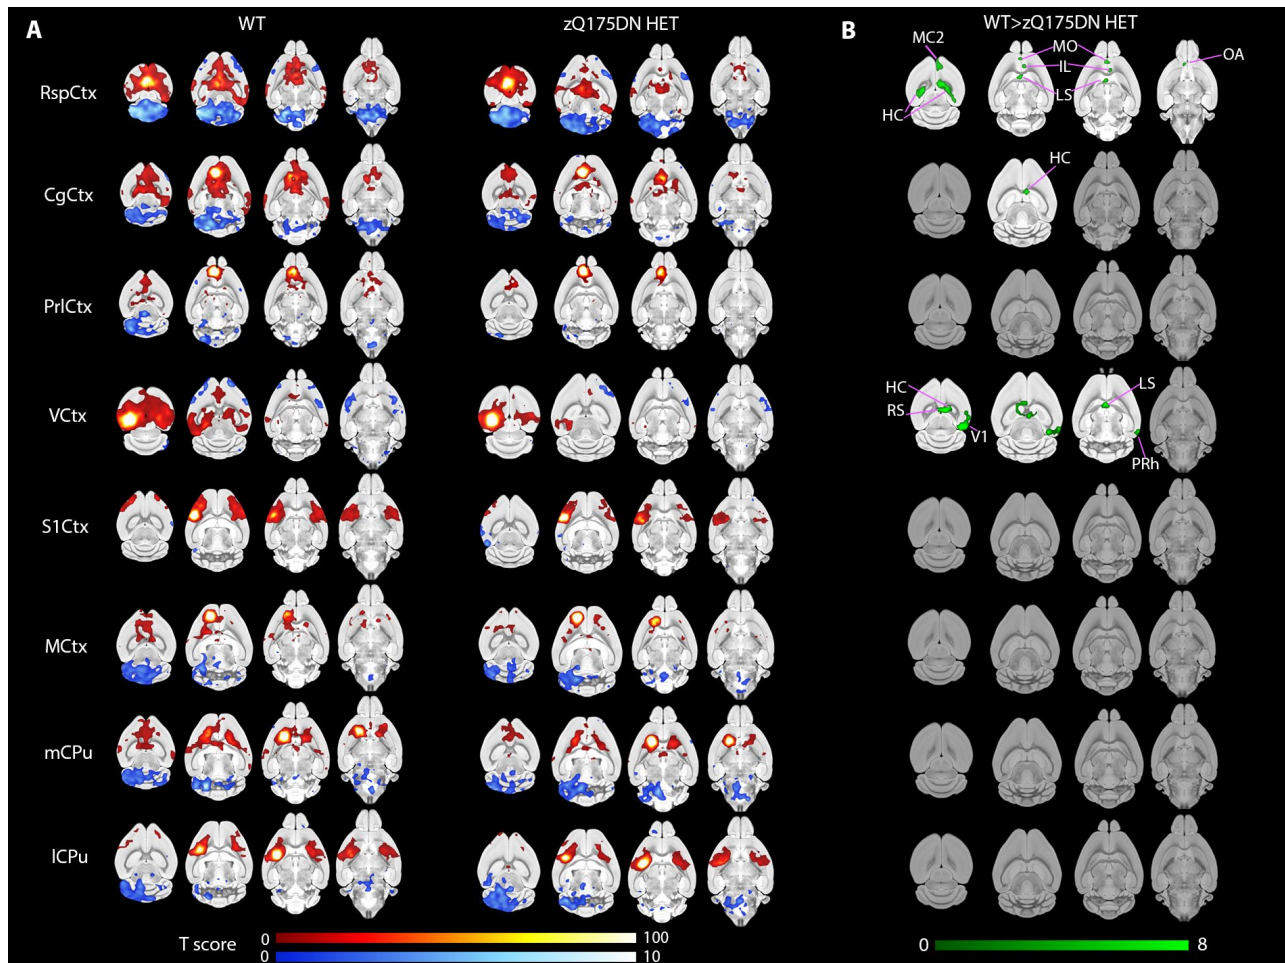

337

338 **Figure 3. Seed-based FC analysis reveals reduced connectivity in the zQ175DN HET at 6 months**  
339 **of age (A)** Group-level T-statistical maps of significantly positively (red) or negatively (blue) correlated  
340 regions with the unilateral seeds in both WT and HET **(B)** Voxel-wise significant differences in  
341 connectivity WT>HET for each seed; T-statistics are FDR corrected for  $p \leq 0.05$  and cluster size ( $k \geq$   
342 10) corrected for  $p \leq 0.05$ ; color scales represent T-values; MC2 - Motor Cortex 2, HC – Hippocampus,  
343 MO – Medial Orbital Cortex, IL – Infralimbic Cortex, LS – Lateral septal nucleus, OA – Olfactory  
344 Area, PRh – Perirhinal Cortex.

345

346

### 347 Network connectivity decreases from 6 to 12 months of age

348 In addition to the inter-regional FC differences observed in zQ175DN HET at different states,  
349 we aimed to also assess the disease-related alterations on a network level. As in the case of  
350 inter-regional FC, there was no significant difference in network FC between genotypes at 3-  
351 months of age (Supplementary Fig. S1B, top row). At 6 months, in both groups, the positive



352 within DMLN, within ACN and DMLN – ACN, and LCN - SuCN connectivity was present  
353 (Fig. 4A, top row). Genotypic differences at this age include decreased FC within DMLN,  
354 within ACN, and between DMLN – ACN in the zQ175DN HET, in line with the observed  
355 ROI-level FC differences (Fig. 1B). At 10 months, only a decrease within the ACN was found  
356 (Supplementary Fig. S1B, bottom row). At 12 months, the within-network, DMLN – ACN,  
357 and LCN – SuCN FC continued to be positive as in earlier ages in both groups. However, the  
358 LCN-DMLN anti-correlation, observed in both groups at earlier ages as well as in WT at 12  
359 months, was no longer present in the zQ175DN HET group as a positive LCN-DMLN FC was  
360 observed (Fig. 4A, bottom row). Between-group comparisons revealed a significantly  
361 decreased within ACN and within SuCN FC and a decreased negative FC between LCN and  
362 ACN in the zQ175DN HET (Fig. 4B, bottom row).

363

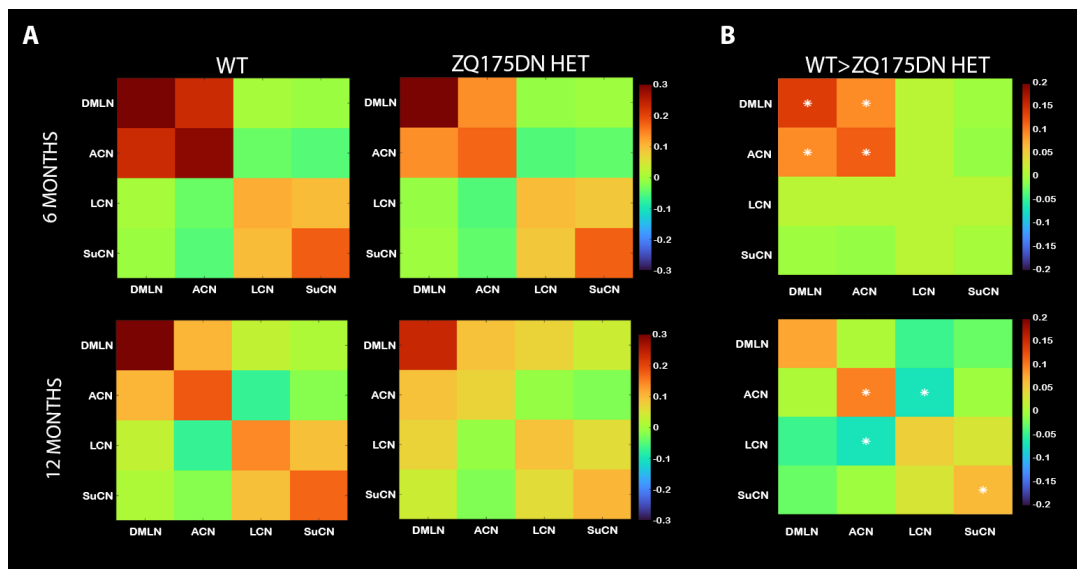

371

372 **Figure 4. Network FC decreases at 6 and 12 months of age in zQ175DN HET and WT mice. (A)**  
373 Mean z-transformed correlation (mirrored) matrices of each group at 6 (top row) and 12 months of age  
374 (bottom row) – within network FC is shown along the diagonal of the matrix; red/orange colors  
375 represent positively correlated connectivity, green color indicates very low to no connectivity between  
376 regions and dark/light blue colors represent negatively correlated connectivity. **(B)** Between-group  
377 differences for 6 and 12 months of age. Red/orange represents lower positive or higher negative FC  
378 between a pair of regions in zQ175DN HET compared to WT while dark/light blue represents higher  
379 positive FC or lower negative FC in zQ175DN HET compared to WT. Asterisk indicates significant  
380 group differences in FC based on a two-sample T-test ( $p \leq 0.05$ , FDR corrected) only performed on  
381 connections that demonstrated a significant FC in at least one group based on a one-sample T-test.



## 382 Age-dependent, region-based FC changes along phenotypic progression

383 In the cross-sectional comparisons, we observed differences in connectivity strength in  
384 different ages in both groups. Additionally, as development and normal aging have been shown  
385 to have an impact on FC<sup>39</sup>, we sought to investigate the disease effect on age-dependent  
386 connectivity changes of several different FC ROI pairs in this model.

387 Overall, in the WT group, in the majority of the region pairs, there was an increase in FC from  
388 3 to 6 months of age, followed by a decreased FC from 6 to 10 months of age (Fig. 5). This  
389 non-linear inverted U-shape has been reported as a normal product of aging. To understand if  
390 this is the case in the zQ175DN HET as well, we first assessed the interhemispheric FC of four  
391 representative regions from each network (Fig. 5, top row). In all four regions, there was no  
392 significant interaction between age and genotype (Table 2). However, there was a significant  
393 age effect following the same inverted U-shape as in the WT group, with the exception of the  
394 S2Ctx which showed no significant change in FC from 3 to 6 months (Fig.5, top row).  
395 Interestingly, a significant genotype effect was present in RspCtx ( $p = 0.0001$ ), S2Ctx ( $p =$   
396  $0.0171$ ) and VCtx ( $p = 5.0E-06$ ) but not in the ICPu ( $p = 0.7144$ ). Thus, while the inverted U-  
397 shape age effect was present in the inter-hemispheric FC of three out of four network  
398 representatives in both genotypes, there was an overall, age-non-specific reduction in FC in the  
399 zQ175DN HET group in these ROIs. In addition, we assessed the FC evolution between  
400 regions from different networks, in an ROI pair of the DMLN - CgCtx with RspCtx, of the  
401 ACN – AuCtx with VCtx, and between DMLN and ACN - AuCtx with RspCtx (Fig. 5, bottom  
402 row). A significant interaction of age and genotype was only present in the Cg – RspCtx  
403 connection ( $p = 0.0461$ ), where the posthoc comparisons revealed a decreased FC at 6 months  
404 in zQ175DN HET ( $p = 0.0118$ ). Furthermore, as opposed to the inverted U-shape FC in the  
405 WT, with a significant increase in FC from 3 to 6 months ( $p = 3.00E-05$ ) followed by a decrease  
406 from 6 to 10 months ( $p = 4.60E$ ), zQ175DN HET showed a decrease of FC only from 6 to 10  
407 months ( $p = 0.016$ ). In the Au – VCtx and Au – RspCtx pairs, there was a significant genotype  
408 effect (see Table 2) but only Au – RspCtx showed an age effect in the form of an inverted U-  
409 shape (Fig. 5, bottom row). Additionally, as the somatosensory regions have been shown as  
410 one of the critically affected areas in Huntington's disease<sup>8</sup>, we explored the disease effect on  
411 age-dependent changes within an ROI pair of the LCN – between S2Ctx and MCtx where no  
412 interaction nor a significant age or genotype effect was found (Fig. 5, bottom row).

413

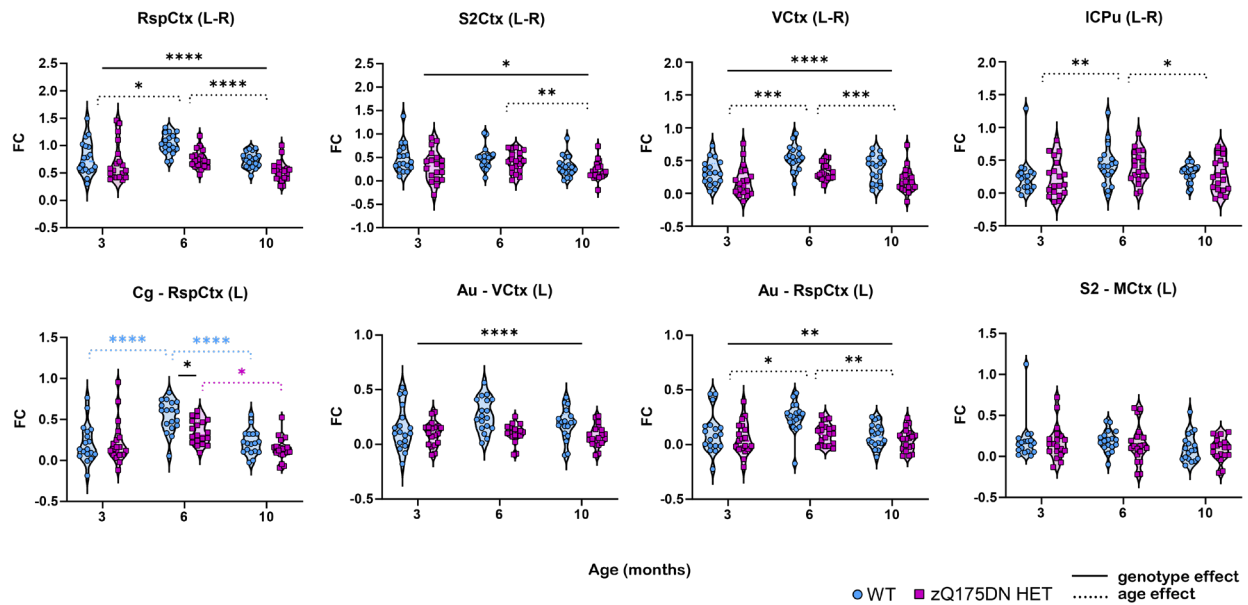

414

415 **Figure 5. Age-dependent change in pairwise FC of a subset of regions in WT and zQ175DN HET**  
 416 **mice.** Plots demonstrate the connectivity change over time for different pairs of regions: RspCtx (L-R),  
 417 S2Ctx (L-R), VCtx (L-R), ICPu (L-R), Cg – RspCtx (L), Au - VCtx (L), Au – RspCtx (L), S2 - MCtx  
 418 (L) for both genotypes. Data are presented as an interquartile range of distribution with subject values  
 419 in both WT (blue circle) and HET (magenta square). Full lines represent the main genotype effect and  
 420 genotype differences at a certain time point; Dashed lines represent the overall age effect (black) or  
 421 within WT (blue) and within zQ175DN HET (magenta). Significant difference after Tukey HSD \*  $p \leq$   
 422 0.05, \*\*  $p \leq 0.01$ , \*\*\*  $p \leq 0.001$ , \*\*\*\*  $p \leq 0.0001$

423

#### 424 Age-susceptible network alterations across different phenotypic states

425 As genotype effects were observed on age-dependent FC changes in several ROI pairs, we also  
 426 investigated whether the disease impacts the normal aging of network-level FC. Initially, we  
 427 assessed the intra-network FC for all four networks (Fig. 6, top row). No significant interaction  
 428 between age and genotype was found in any of the four networks, however, a significant age  
 429 effect was present (see Table 3), with the already observed non-linear trend (Fig.6, bottom  
 430 row). A significant genotype effect was found only in the DMLN and ACN. Subsequently, we  
 431 evaluated the impact of the disease on the inter-network connectivity, especially in the  
 432 networks that were shown to be impacted in the zQ175DN HET group (Fig. 4B, Supplementary  
 433 Fig.S1B) and are either positively (DMLN with ACN and LCN with SuCN) or negatively  
 434 (LCN with DMLN and LCN with ACN) correlated (Fig. 6, bottom row). No interaction of age  
 435 and genotype was present between any of the networks (see Table 2), but there was a significant

436 age effect in the DMLN – ACN and LCN – SuCN pairs, following the same non-linear trend,  
437 and a significant genotype effect only found in the DMLN – ACN FC (Fig. 6, bottom row).

438

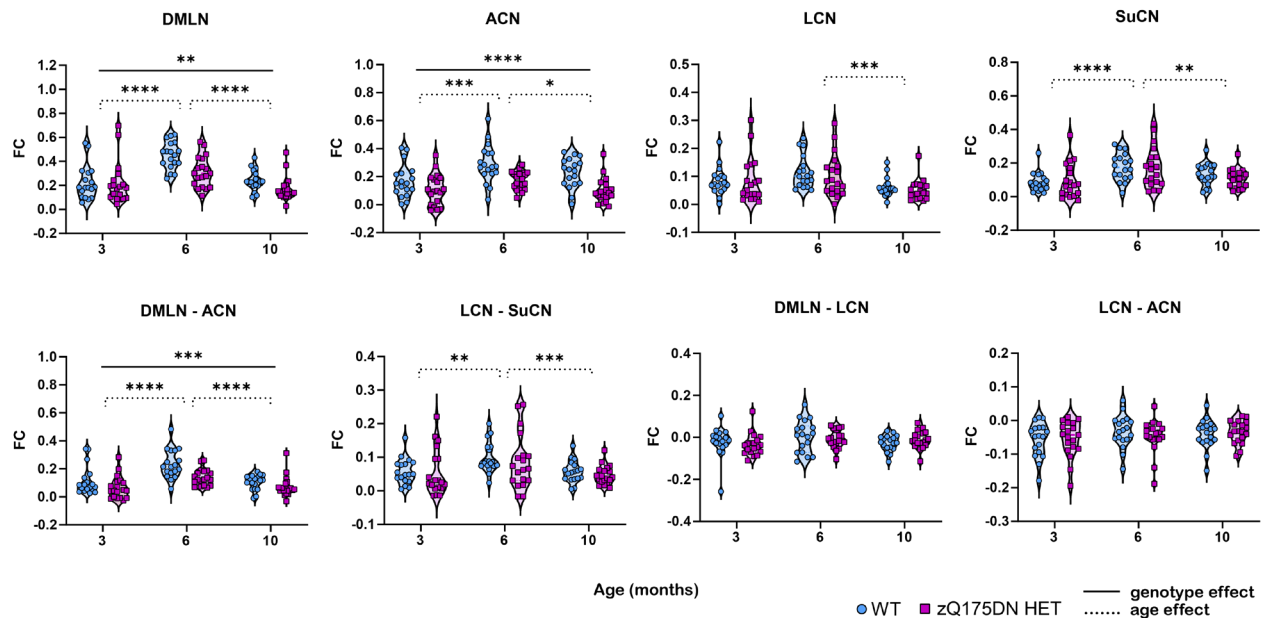

439

440 **Figure 6. Age-dependent change in network FC in both WT and zQ175DN HET mice.** Plots  
441 demonstrate the connectivity change over time for different networks: intra-DMLN, ACN, LCN, SuCN,  
442 and between DMLN – ACN, LCN – SuCN, DMLN – LCN, LCN – ACN for both genotypes. Data are  
443 presented as an interquartile range of distribution with subject values in both WT (blue circle) and  
444 zQ175DN HET (magenta square). Full lines represent the main genotype effect and genotype  
445 differences at a certain time point; Dashed lines represent the overall time effect (black) or within WT  
446 (blue) and zQ175DN HET (magenta). Significant difference after Tukey HSD \*  $p \leq 0.05$ , \*\*  $p \leq 0.01$ ,  
447 \*\*\*  $p \leq 0.001$ , \*\*\*\*  $p \leq 0.0001$

448

## 449 DISCUSSION

450

451 To our knowledge this study is the first to investigate longitudinal changes in large-scale brain  
452 network functional connectivity across disease progression in a Huntington's disease animal  
453 model. At 3 months, our findings showed no significant difference in either region or network  
454 FC in the zQ175DN HET compared to WT. At both 6 and 10 months, connectivity reductions  
455 between regions of the default mode-like and associated cortical network were continuously  
456 present in the zQ175DN HET mice. Interestingly, at 12 months of age, a shift towards

457 decreased connectivity in the lateral and subcortical regions appeared, where the lateral CPu,  
458 the most vulnerable region in Huntington's disease, exhibited reduced cortical connectivity.  
459 Moreover, our results demonstrated age-dependent connectivity changes as a byproduct of  
460 normal aging in the zQ175DN HET mice, in the form of an inverse U-shape, as observed in  
461 the WT group. The neuropathologically driven impact on the age-dependent FC evolution was  
462 present in the default mode and associative cortical networks with diminished connectivity in  
463 the zQ175DN HET mice. In addition, at 6 months, reduced cingulate – retrosplenial cortex  
464 connectivity interfered with the normal FC progression in the zQ175DN HET mice.

465 The retrosplenial, cingulate, pre- and infralimbic, orbital cortex, and hippocampus are the  
466 constituents of the DMLN, a rodent analog to the human default mode network (DMN), which  
467 represents correlated activity between these brain regions in the absence of a goal-oriented  
468 task.<sup>36,40-42</sup> Many studies have accentuated the relevance of DMN, especially in neurological  
469 disorders.<sup>43-46</sup> Our results from both seed- and ROI-based FC analyses have demonstrated  
470 consistently a reduced FC within DMLN connectivity in the zQ175DN HET mice, including  
471 the retrosplenial and cingulate cortices, and the medial prefrontal cortex (mPFC) regions such  
472 as orbital, pre- and infralimbic cortices<sup>47</sup>, present in an early disease-like phenotypic state.  
473 These findings are consistent with widespread DMN alterations observed in PwHD.<sup>21,48,49</sup>

474 At 6 months, with a seed in the retrosplenial cortex, we observed decreased FC with the motor  
475 cortex 2, hippocampus, lateral septum, and the mPFC regions. Interestingly, the relationship in  
476 mice between the retrosplenial and motor cortex is known to be involved in sensorimotor  
477 processing and motor control.<sup>50</sup> Hence, impaired FC between those regions might potentially  
478 explain the motor abnormalities that start at 6 months of age. The retrosplenial cortex and the  
479 lateral septal nucleus are regions that are important in memory processing and hippocampal  
480 efferent projections to these areas are critical in cognitive processes.<sup>51</sup>

481 Noteworthy is that at 6 months, cognitive deficits are present in this Huntington's Disease  
482 mouse model and others,<sup>52,53</sup> which is in line with the well-known cognitive and memory  
483 deficits described in PwHD.<sup>54-60</sup>

484 Alterations in the auditory system have been reported in both preclinical and PwHD.<sup>61-63</sup> In line  
485 with this, our findings showed, at 6 months, a decreased FC between the auditory with the  
486 cingulate, retrosplenial, and visual cortices in the zQ175DN HET mice. The cingulate is part  
487 of the auditory cortical network while the retrosplenial cortex is relevant in auditory memory-  
488 related processes.<sup>64,65</sup> Most importantly, the decreased FC in the associative network,

489 comprised of the auditory and visual cortices, indicates impaired visual and auditory processing  
490 at this age; this supports recent findings of altered dynamics of the sensory and motor cortices  
491 of the zQ175 HET model when using auditory and visual sensory stimulation at the same age  
492 of 6 months.<sup>26</sup> In addition, the reduced FC of the visual cortex with memory-related regions  
493 (HC, LS, PRh) and the retrosplenial cortex, accentuates our findings of marked cognitive and  
494 sensory cortical connectivity alterations at this early Huntington's disease-like phenotypic  
495 state.

496 Our findings show a shift in network alteration towards the lateral cortical and subcortical  
497 network regions in the zQ175DN HET mice at 12 months of age. Compared to the early  
498 changes where we observed altered FC in multiple connections from both DMLN and the  
499 associative network, at this age, only interhemispheric connectivity of retrosplenial and  
500 auditory cortices showed reduced FC, from each network respectively. The most interesting  
501 finding by this age, are the reduced changes related to these networks and the more pronounced  
502 differences within and between the lateral and subcortical networks. Two of the components  
503 of the lateral network, the somatosensory 2 and the insular cortex, have been shown to  
504 participate in multimodal sensory processing in both humans and rodents.<sup>66,67</sup> The observed  
505 decreased FC in these regions in the zQ175DN HET mice at 12 months, is in line with previous  
506 findings in PwHD in Huntington's disease patients in regions pertaining to the sensory-motor  
507 network.<sup>68</sup> However, some clinical studies in PwHD have also shown increased FC within this  
508 network, attributing those changes to a generalized activity spread due to a loss of  
509 specialization in neuronal function.<sup>69,70</sup> The lateral CPu, part of the subcortical network, also  
510 shows a reduction in FC with the insular and piriform cortex. CPu connectivity has been  
511 extensively mapped, showing compartmentalized differences in projections with both of these  
512 regions.<sup>71,72</sup> Interestingly, the insular cortex has been shown to have a relevant function in  
513 switching between large-scale brain networks<sup>73</sup> but also in body spatial awareness, which has  
514 been reported as altered in PwHD.<sup>63</sup> Moreover, as the piriform cortex is the key area in  
515 olfactory processing, dysfunction in olfactory discrimination is present in both PwHD<sup>74,75</sup> and  
516 rodent models, specifically in the zQ175 HET model at the same age of 12 months.<sup>76,77</sup>

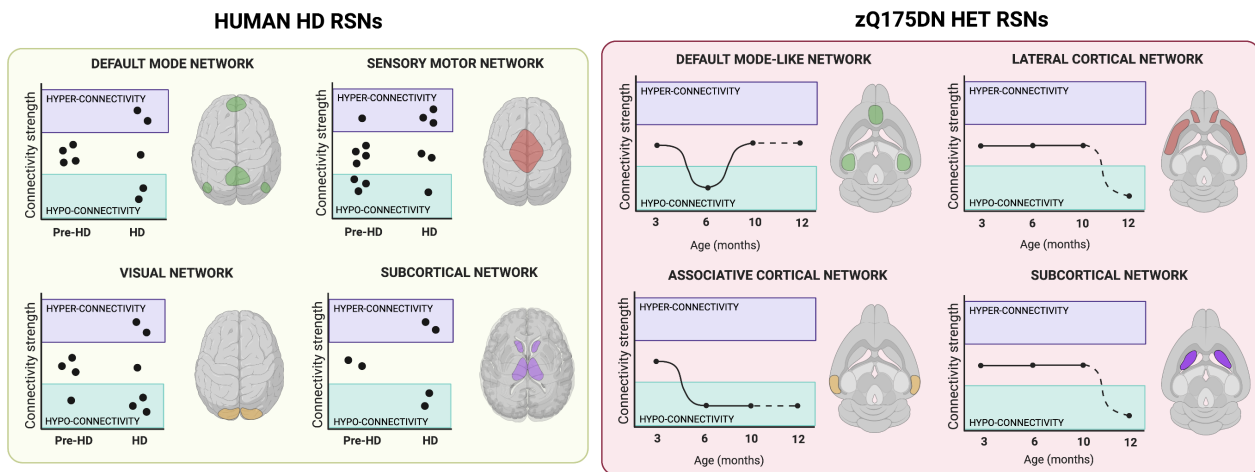

517

518 **Figure 7. RSN alterations along the course of Huntington's disease in humans and in the**  
519 **zQ175DN HET mouse model.** Human rsfMRI cross-sectional studies (each point represents a study's  
520 result) demonstrate diverse outcomes in different RSNs in both pre- and manifest stages relative to age-  
521 matched controls; Longitudinal course of RSNs evolution from pre-manifest to different manifest states  
522 in the zQ175DN HET mice compared to age-matched controls (full line links points from the  
523 longitudinal study while dashed line links the cross-sectional study point); HD = Huntington's disease.  
524 Figure created with BioRender.com.

525

526 A major advantage of our longitudinal study was the ability to look at the potential disease-like  
527 modifying effects on normal aging in different large-scale brain network FC in the zQ175DN  
528 HET mice. Network changes as a consequence of normal aging have been shown in both  
529 humans and rodents.<sup>39,78,79</sup> The first detailed examination of the aging effect on functional brain  
530 networks in rodents followed the DMLN, sensorimotor and subcortical networks from 3 to 13  
531 months of age and observed an evolution in the form of an inverse U-shape.<sup>39</sup> We observed the  
532 same nonlinear behavior in the WT groups, with an FC increase from 3 to 6 and later a decrease  
533 from 6 to 10 months of age. In the case of the zQ175DN HET mice, selected region pairs from  
534 each network also followed the non-linear inverted U-shape change. The regions belonging to  
535 the DMLN and the associative cortical network followed this pattern, especially in the  
536 cingulate-retrosplenial cortex FC where we observed decreased FC in the zQ175DN HET  
537 group at motor deficit onset, revealing that the disease-driven alterations impede the typical  
538 age effect of increased FC from 3 to 6 months. An overall distinct genotypic effect was  
539 observed in the interhemispheric retrosplenial-visual cortex connectivity but also between the  
540 auditory with the visual and retrosplenial cortex, reiterating the vulnerability of the DMLN and  
541 ACN regions. The normal aging effect on network FC findings followed the same nonlinear



542 inverted U-shape as the region-based FC, especially within all networks except for the lateral  
543 network where only a significantly decreased FC from 6 to 10 months was present. In line with  
544 the region-based FC, the apparent genotype effect was present in the intra- and inter-  
545 connectivity of the DMLN and the associative cortical network. As shown from tracing studies,  
546 the strong connectivity between these two networks<sup>80</sup> and between the lateral and subcortical  
547 network<sup>71</sup> is also reflected in the clearly inverted trend that these network pairs followed. The  
548 lateral cortical network is the rodent homologous of the task-positive network (TPN), the anti-  
549 correlated network to the DMN<sup>81</sup>. We have consistently found low anti-correlated FC with  
550 DMLN and associative cortical network in the zQ175DN HET mice. Hence, this was aligned  
551 with the finding that the lateral network connectivity with DMLN and the associative cortical  
552 network showed no significant trend across time in both genotypes.

553 We didn't observe any significant region or network-level FC alterations at 3 months of age in  
554 this model. Electrophysiological studies in this model have already demonstrated changes in  
555 cortical frequencies that reflect increased synaptic responses.<sup>24</sup> Additionally, increased local  
556 inhibitory activity in the cortical projection neurons of the motor cortex is present as early as 2  
557 months of age in the zQ175 HET model as a means of counteracting and preventing the cortical  
558 excitation to reach medium spiny neurons in the striatum.<sup>23</sup> Similarly, cortical  
559 hyperexcitability, measured by two-photon calcium imaging, was also found before motor  
560 abnormalities appear in the R6/2 HD mouse model.<sup>25</sup> Suggesting the cortex as a relevant target  
561 in Huntington's disease is a study that shows that reduced full-length *mHtt* expression in the  
562 motor cortex of a mouse model leads to rescue in striatal activity.<sup>82</sup> Cortical alterations have  
563 been reported in the homozygous form of zQ175 mice, where EEG recordings show field  
564 disruptions even before 3 months of age.<sup>83</sup> Our findings imply that resting-state FC, which  
565 measures average correlation across the entire scanning duration, may not be sufficiently  
566 sensitive to pick up differences at 3 months. More advanced methods that capture temporal  
567 fluctuations in FC during the scan may be more suitable to detect more subtle changes  
568 occurring at this early age.<sup>84,85</sup>

569 Regions relevant for movement execution and control are the motor and somatosensory  
570 cortices. The zQ175DN HET mice showed more robust changes in FC in these regions in a  
571 late manifest state, at 12 months of age, albeit the initially decreased FC between retrosplenial  
572 and motor cortex at 6 months. Concerning human studies, the sensory-motor network has been  
573 implicated to follow a non-linear trajectory of pre-manifest hypo-connectivity towards a hyper-  
574 connectivity pattern in clinical stages<sup>20</sup> (Fig. 7). However, many factors such as different stages



575 of the disease, movement, medication intake, and inclusion criteria can influence the lack of  
576 reproducibility of these results in different studies.

577 Although the zQ175DN HET mouse model has been shown to closely mimic several aspects  
578 of Huntington's disease<sup>28,29</sup>, an important limitation is that it is still a preclinical model that,  
579 despite showing striatal and cortical volume decreases as early as 3-4 months, it does not show  
580 neuronal loss at a very early point, which is one of the hallmarks of Huntington's disease.<sup>86,87</sup>  
581 While no striking loss is identified in the zQ175 HET, there are changes in neuronal  
582 morphology.<sup>88</sup> However, neurons are only one of the contributing elements of the BOLD signal  
583 in RSNs that could potentially influence the whole-brain network architecture.<sup>89</sup> Hence, an  
584 additional assessment of other components of the neurovascular unit, such as astrocytes and  
585 pericytes, could potentially elucidate the effect of mHTT on these cell populations with regards  
586 to the disease-driven network alterations.<sup>90</sup>

587 In summary, our findings demonstrate for the first time the longitudinal perturbations in large-  
588 scale brain networks that occur in a Huntington's disease mouse model (Fig. 7). The results  
589 provide insight into how connectivity in distinct cortical and subcortical regions is divergently  
590 affected along different disease-like phenotypic states. Moreover, our data emphasize how  
591 cortical circuitries play an important role in whole-brain network changes in the zQ175 HET  
592 HD mouse model, and suggest that further research is warranted to investigate the underlying  
593 neural dynamics of these cortical disease-dependent changes. Closer investigation of the  
594 specific cellular and molecular mechanisms of different cortico-cortical and cortico-striatal  
595 circuits will provide a better understanding of the cellular network interaction in Huntington's  
596 disease.

597

598

## 599 **Funding**

600

601 The author(s) disclosed receipt of the following financial support for the research, authorship,  
602 and/or publication of this article: This work was funded by CHDI Foundation, Inc., a nonprofit  
603 biomedical research organization exclusively dedicated to collaboratively developing  
604 therapeutics that will substantially improve the lives of HD-affected individuals. The  
605 computational resources and services used in this work were provided by the HPC core facility  
606 CalcUA of the University of Antwerp, the VSC (Flemish Supercomputer Center), funded by  
607 the Hercules Foundation, and the Flemish Government department EWI. The Flemish Impulse

608 funding for heavy scientific equipment under grant agreement number 42/FA010100/1230

609 (granted to Annemie Van der Linden).

610

611

612

613

614

615

616

617

618

619

620

621

622

623

624

## 625 References

- 626 1. Bates GP, Dorsey R, Gusella JF, et al. Huntington disease. *Nat Rev Dis Primers*. Apr  
627 23 2015;1:15005. doi:10.1038/nrdp.2015.5
- 628 2. Ghosh R, Tabrizi SJ. Clinical Features of Huntington's Disease. *Adv Exp Med Biol*.  
629 2018;1049:1-28. doi:10.1007/978-3-319-71779-1\_1
- 630 3. A novel gene containing a trinucleotide repeat that is expanded and unstable on  
631 Huntington's disease chromosomes. The Huntington's Disease Collaborative Research Group.  
632 *Cell*. Mar 26 1993;72(6):971-83. doi:10.1016/0092-8674(93)90585-e
- 633 4. Ross CA, Tabrizi SJ. Huntington's disease: from molecular pathogenesis to clinical  
634 treatment. *Lancet Neurol*. Jan 2011;10(1):83-98. doi:10.1016/S1474-4422(10)70245-3
- 635 5. Rosas HD, Hevelone ND, Zaleta AK, Greve DN, Salat DH, Fischl B. Regional  
636 cortical thinning in preclinical Huntington disease and its relationship to cognition.  
637 *Neurology*. Sep 13 2005;65(5):745-7. doi:10.1212/01.wnl.0000174432.87383.87
- 638 6. Rosas HD, Salat DH, Lee SY, et al. Cerebral cortex and the clinical expression of  
639 Huntington's disease: complexity and heterogeneity. *Brain*. Apr 2008;131(Pt 4):1057-68.  
640 doi:10.1093/brain/awn025
- 641 7. Waldvogel HJ, Kim EH, Thu DC, Tippett LJ, Faull RL. New Perspectives on the  
642 Neuropathology in Huntington's Disease in the Human Brain and its Relation to Symptom  
643 Variation. *J Huntingtons Dis*. 2012;1(2):143-53. doi:10.3233/JHD-2012-120018
- 644 8. Estrada-Sanchez AM, Rebec GV. Role of cerebral cortex in the neuropathology of  
645 Huntington's disease. *Front Neural Circuits*. 2013;7:19. doi:10.3389/fncir.2013.00019
- 646 9. Nopoulos PC, Aylward EH, Ross CA, et al. Cerebral cortex structure in prodromal  
647 Huntington disease. *Neurobiol Dis*. Dec 2010;40(3):544-54. doi:10.1016/j.nbd.2010.07.014
- 648 10. Unschuld PG, Joel SE, Liu X, et al. Impaired cortico-striatal functional connectivity  
649 in prodromal Huntington's Disease. *Neurosci Lett*. Apr 18 2012;514(2):204-9.  
650 doi:10.1016/j.neulet.2012.02.095
- 651 11. Poudel GR, Egan GF, Churchyard A, Chua P, Stout JC, Georgiou-Karistianis N.  
652 Abnormal synchrony of resting state networks in premanifest and symptomatic Huntington  
653 disease: the IMAGE-HD study. *J Psychiatry Neurosci*. Mar 2014;39(2):87-96.  
654 doi:10.1503/jpn.120226
- 655 12. Tabrizi SJ, Schobel S, Gantman EC, et al. A biological classification of Huntington's  
656 disease: the Integrated Staging System. *Lancet Neurol*. Jul 2022;21(7):632-644.  
657 doi:10.1016/S1474-4422(22)00120-X
- 658 13. Zeun P, Scahill RI, Tabrizi SJ, Wild EJ. Fluid and imaging biomarkers for  
659 Huntington's disease. *Mol Cell Neurosci*. Jun 2019;97:67-80. doi:10.1016/j.mcn.2019.02.004
- 660 14. D JF, Stout JC, Poudel G, et al. Multimodal imaging biomarkers in premanifest and  
661 early Huntington's disease: 30-month IMAGE-HD data. *Br J Psychiatry*. Jun  
662 2016;208(6):571-8. doi:10.1192/bjp.bp.114.156588
- 663 15. Wilson H, De Micco R, Niccolini F, Politis M. Molecular Imaging Markers to Track  
664 Huntington's Disease Pathology. *Front Neurol*. 2017;8:11. doi:10.3389/fneur.2017.00011
- 665 16. van den Heuvel MI, Turk E, Manning JH, et al. Hubs in the human fetal brain  
666 network. *Dev Cogn Neurosci*. Apr 2018;30:108-115. doi:10.1016/j.dcn.2018.02.001
- 667 17. Fransson P. Spontaneous low-frequency BOLD signal fluctuations: an fMRI  
668 investigation of the resting-state default mode of brain function hypothesis. *Hum Brain*  
669 *Mapp*. Sep 2005;26(1):15-29. doi:10.1002/hbm.20113
- 670 18. Zhang HY, Wang SJ, Liu B, et al. Resting brain connectivity: changes during the  
671 progress of Alzheimer disease. *Radiology*. Aug 2010;256(2):598-606.  
672 doi:10.1148/radiol.10091701

- 673 19. Luo C, Song W, Chen Q, et al. Reduced functional connectivity in early-stage drug-  
674 naive Parkinson's disease: a resting-state fMRI study. *Neurobiol Aging*. Feb 2014;35(2):431-  
675 41. doi:10.1016/j.neurobiolaging.2013.08.018
- 676 20. Pini L, Jacquemot C, Cagnin A, et al. Aberrant brain network connectivity in  
677 presymptomatic and manifest Huntington's disease: A systematic review. *Hum Brain Mapp*.  
678 Jan 2020;41(1):256-269. doi:10.1002/hbm.24790
- 679 21. Dumas EM, van den Bogaard SJ, Hart EP, et al. Reduced functional brain  
680 connectivity prior to and after disease onset in Huntington's disease. *Neuroimage Clin*.  
681 2013;2:377-84. doi:10.1016/j.nicl.2013.03.001
- 682 22. Wolf RC, Sambataro F, Vasic N, et al. Visual system integrity and cognition in early  
683 Huntington's disease. *Eur J Neurosci*. Jul 2014;40(2):2417-26. doi:10.1111/ejn.12575
- 684 23. Indersmitten T, Tran CH, Cepeda C, Levine MS. Altered excitatory and inhibitory  
685 inputs to striatal medium-sized spiny neurons and cortical pyramidal neurons in the Q175  
686 mouse model of Huntington's disease. *J Neurophysiol*. Apr 1 2015;113(7):2953-66.  
687 doi:10.1152/jn.01056.2014
- 688 24. Donzis EJ, Estrada-Sanchez AM, Indersmitten T, et al. Cortical Network Dynamics Is  
689 Altered in Mouse Models of Huntington's Disease. *Cereb Cortex*. Apr 14 2020;30(4):2372-  
690 2388. doi:10.1093/cercor/bhz245
- 691 25. Burgold J, Schulz-Trieglaff EK, Voelkl K, et al. Cortical circuit alterations precede  
692 motor impairments in Huntington's disease mice. *Sci Rep*. Apr 29 2019;9(1):6634.  
693 doi:10.1038/s41598-019-43024-w
- 694 26. Sepers MD, Mackay JP, Koch E, et al. Altered cortical processing of sensory input in  
695 Huntington disease mouse models. *Neurobiol Dis*. Apr 20 2022;169:105740.  
696 doi:10.1016/j.nbd.2022.105740
- 697 27. Gu X, Li C, Wei W, et al. Pathological cell-cell interactions elicited by a  
698 neuropathogenic form of mutant Huntingtin contribute to cortical pathogenesis in HD mice.  
699 *Neuron*. May 5 2005;46(3):433-44. doi:10.1016/j.neuron.2005.03.025
- 700 28. Menalled LB, Kudwa AE, Miller S, et al. Comprehensive behavioral and molecular  
701 characterization of a new knock-in mouse model of Huntington's disease: zQ175. *PLoS One*.  
702 2012;7(12):e49838. doi:10.1371/journal.pone.0049838
- 703 29. Heikkinen T, Bragge T, Bhattarai N, et al. Rapid and robust patterns of spontaneous  
704 locomotor deficits in mouse models of Huntington's disease. *PLoS One*.  
705 2020;15(12):e0243052. doi:10.1371/journal.pone.0243052
- 706 30. Carty N, Berson N, Tillack K, et al. Characterization of HTT inclusion size, location,  
707 and timing in the zQ175 mouse model of Huntington's disease: an in vivo high-content  
708 imaging study. *PLoS One*. 2015;10(4):e0123527. doi:10.1371/journal.pone.0123527
- 709 31. Southwell AL, Smith-Dijak A, Kay C, et al. An enhanced Q175 knock-in mouse  
710 model of Huntington disease with higher mutant huntingtin levels and accelerated disease  
711 phenotypes. *Hum Mol Genet*. Sep 1 2016;25(17):3654-3675. doi:10.1093/hmg/ddw212
- 712 32. Fox JG BS, Davisson MT, Newcomer CE, Quimby FW, Smith AL, eds. *The Mouse in*  
713 *Biomedical Research, 2nd Edition*. vol 3. Elsevier 2007:637-72.
- 714 33. Jonckers E, Delgado y Palacios R, Shah D, Guglielmetti C, Verhoye M, Van der  
715 Linden A. Different anesthesia regimes modulate the functional connectivity outcome in  
716 mice. *Magn Reson Med*. Oct 2014;72(4):1103-12. doi:10.1002/mrm.24990
- 717 34. Grandjean J, Schroeter A, Batata I, Rudin M. Optimization of anesthesia protocol for  
718 resting-state fMRI in mice based on differential effects of anesthetics on functional  
719 connectivity patterns. *Neuroimage*. Nov 15 2014;102 Pt 2:838-47.  
720 doi:10.1016/j.neuroimage.2014.08.043

- 721 35. Praet J, Manyakov NV, Muchene L, et al. Diffusion kurtosis imaging allows the early  
722 detection and longitudinal follow-up of amyloid-beta-induced pathology. *Alzheimers Res*  
723 *Ther.* Jan 9 2018;10(1):1. doi:10.1186/s13195-017-0329-8
- 724 36. Liska A, Galbusera A, Schwarz AJ, Gozzi A. Functional connectivity hubs of the  
725 mouse brain. *Neuroimage.* Jul 15 2015;115:281-91. doi:10.1016/j.neuroimage.2015.04.033
- 726 37. Bukhari Q, Schroeter A, Cole DM, Rudin M. Resting State fMRI in Mice Reveals  
727 Anesthesia Specific Signatures of Brain Functional Networks and Their Interactions. *Front*  
728 *Neural Circuits.* 2017;11:5. doi:10.3389/fncir.2017.00005
- 729 38. Janke AL, Ullmann JF. Robust methods to create ex vivo minimum deformation  
730 atlases for brain mapping. *Methods.* Feb 2015;73:18-26. doi:10.1016/j.ymeth.2015.01.005
- 731 39. Egimendia A, Minassian A, Diedenhofen M, Wiedermann D, Ramos-Cabrer P,  
732 Hoehn M. Aging Reduces the Functional Brain Networks Strength-a Resting State fMRI  
733 Study of Healthy Mouse Brain. *Front Aging Neurosci.* 2019;11:277.  
734 doi:10.3389/fnagi.2019.00277
- 735 40. Gozzi A, Schwarz AJ. Large-scale functional connectivity networks in the rodent  
736 brain. *Neuroimage.* Feb 15 2016;127:496-509. doi:10.1016/j.neuroimage.2015.12.017
- 737 41. Sforazzini F, Schwarz AJ, Galbusera A, Bifone A, Gozzi A. Distributed BOLD and  
738 CBV-weighted resting-state networks in the mouse brain. *Neuroimage.* Feb 15 2014;87:403-  
739 15. doi:10.1016/j.neuroimage.2013.09.050
- 740 42. Raichle ME. The brain's default mode network. *Annu Rev Neurosci.* Jul 8  
741 2015;38:433-47. doi:10.1146/annurev-neuro-071013-014030
- 742 43. Buckner RL, Andrews-Hanna JR, Schacter DL. The brain's default network: anatomy,  
743 function, and relevance to disease. *Ann N Y Acad Sci.* Mar 2008;1124:1-38.  
744 doi:10.1196/annals.1440.011
- 745 44. Jones DT, Knopman DS, Gunter JL, et al. Cascading network failure across the  
746 Alzheimer's disease spectrum. *Brain.* Feb 2016;139(Pt 2):547-62. doi:10.1093/brain/awv338
- 747 45. Koch W, Teipel S, Mueller S, et al. Diagnostic power of default mode network resting  
748 state fMRI in the detection of Alzheimer's disease. *Neurobiol Aging.* Mar 2012;33(3):466-78.  
749 doi:10.1016/j.neurobiolaging.2010.04.013
- 750 46. van Eimeren T, Monchi O, Ballanger B, Strafella AP. Dysfunction of the default  
751 mode network in Parkinson disease: a functional magnetic resonance imaging study. *Arch*  
752 *Neurol.* Jul 2009;66(7):877-83. doi:10.1001/archneurol.2009.97
- 753 47. Laubach M, Amarante LM, Swanson K, White SR. What, If Anything, Is Rodent  
754 Prefrontal Cortex? *eNeuro.* Sep-Oct 2018;5(5)doi:10.1523/ENEURO.0315-18.2018
- 755 48. Quarantelli M, Salvatore E, Giorgio SM, et al. Default-mode network changes in  
756 Huntington's disease: an integrated MRI study of functional connectivity and morphometry.  
757 *PLoS One.* 2013;8(8):e72159. doi:10.1371/journal.pone.0072159
- 758 49. Hobbs NZ, Pedrick AV, Say MJ, et al. The structural involvement of the cingulate  
759 cortex in premanifest and early Huntington's disease. *Mov Disord.* Aug 1 2011;26(9):1684-  
760 90. doi:10.1002/mds.23747
- 761 50. Yamawaki N, Radulovic J, Shepherd GM. A Corticocortical Circuit Directly Links  
762 Retrosplenial Cortex to M2 in the Mouse. *J Neurosci.* Sep 7 2016;36(36):9365-74.  
763 doi:10.1523/JNEUROSCI.1099-16.2016
- 764 51. Opalka AN, Wang DV. Hippocampal efferents to retrosplenial cortex and lateral  
765 septum are required for memory acquisition. *Learn Mem.* Aug 2020;27(8):310-318.  
766 doi:10.1101/lm.051797.120
- 767 52. Farrar AM, Murphy CA, Paterson NE, et al. Cognitive deficits in transgenic and  
768 knock-in HTT mice parallel those in Huntington's disease. *J Huntingtons Dis.* 2014;3(2):145-  
769 58. doi:10.3233/JHD-130061



- 770 53. Lione LA, Carter RJ, Hunt MJ, Bates GP, Morton AJ, Dunnett SB. Selective  
771 discrimination learning impairments in mice expressing the human Huntington's disease  
772 mutation. *J Neurosci*. Dec 1 1999;19(23):10428-37.
- 773 54. Paulsen JS, Conybeare RA. Cognitive changes in Huntington's disease. *Adv Neurol*.  
774 2005;96:209-25.
- 775 55. Beglinger LJ, Nopoulos PC, Jorge RE, et al. White matter volume and cognitive  
776 dysfunction in early Huntington's disease. *Cogn Behav Neurol*. Jun 2005;18(2):102-7.  
777 doi:10.1097/01.wmn.0000152205.79033.73
- 778 56. Montoya A, Pelletier M, Menear M, Duplessis E, Richer F, Lepage M. Episodic  
779 memory impairment in Huntington's disease: a meta-analysis. *Neuropsychologia*.  
780 2006;44(10):1984-94. doi:10.1016/j.neuropsychologia.2006.01.015
- 781 57. Lange KW, Sahakian BJ, Quinn NP, Marsden CD, Robbins TW. Comparison of  
782 executive and visuospatial memory function in Huntington's disease and dementia of  
783 Alzheimer type matched for degree of dementia. *J Neurol Neurosurg Psychiatry*. May  
784 1995;58(5):598-606. doi:10.1136/jnnp.58.5.598
- 785 58. Lawrence AD, Sahakian BJ, Hodges JR, Rosser AE, Lange KW, Robbins TW.  
786 Executive and mnemonic functions in early Huntington's disease. *Brain*. Oct 1996;119 ( Pt  
787 5):1633-45. doi:10.1093/brain/119.5.1633
- 788 59. Albert MS, Butters N, Brandt J. Development of remote memory loss in patients with  
789 Huntington's disease. *J Clin Neuropsychol*. May 1981;3(1):1-12.  
790 doi:10.1080/01688638108403109
- 791 60. Begeti F, Schwab LC, Mason SL, Barker RA. Hippocampal dysfunction defines  
792 disease onset in Huntington's disease. *J Neurol Neurosurg Psychiatry*. Sep 2016;87(9):975-  
793 81. doi:10.1136/jnnp-2015-312413
- 794 61. Profant O, Roth J, Bures Z, et al. Auditory dysfunction in patients with Huntington's  
795 disease. *Clin Neurophysiol*. Oct 2017;128(10):1946-1953. doi:10.1016/j.clinph.2017.07.403
- 796 62. Saft C, Schuttke A, Beste C, Andrich J, Heindel W, Pfliegerer B. fMRI reveals altered  
797 auditory processing in manifest and premanifest Huntington's disease. *Neuropsychologia*.  
798 Apr 2008;46(5):1279-89. doi:10.1016/j.neuropsychologia.2007.12.002
- 799 63. Labuschagne I, Cassidy AM, Scahill RI, et al. Visuospatial Processing Deficits  
800 Linked to Posterior Brain Regions in Premanifest and Early Stage Huntington's Disease. *J Int  
801 Neuropsychol Soc*. Jul 2016;22(6):595-608. doi:10.1017/S1355617716000321
- 802 64. Todd TP, Mehlman ML, Keene CS, DeAngeli NE, Bucci DJ. Retrosplenial cortex is  
803 required for the retrieval of remote memory for auditory cues. *Learn Mem*. Jun  
804 2016;23(6):278-88. doi:10.1101/lm.041822.116
- 805 65. Hackett TA. Information flow in the auditory cortical network. *Hear Res*. Jan  
806 2011;271(1-2):133-46. doi:10.1016/j.heares.2010.01.011
- 807 66. Downar J, Crawley AP, Mikulis DJ, Davis KD. A multimodal cortical network for the  
808 detection of changes in the sensory environment. *Nat Neurosci*. Mar 2000;3(3):277-83.  
809 doi:10.1038/72991
- 810 67. Rodgers KM, Benison AM, Klein A, Barth DS. Auditory, somatosensory, and  
811 multisensory insular cortex in the rat. *Cereb Cortex*. Dec 2008;18(12):2941-51.  
812 doi:10.1093/cercor/bhn054
- 813 68. Muller HP, Gorges M, Gron G, et al. Motor network structure and function are  
814 associated with motor performance in Huntington's disease. *J Neurol*. Mar 2016;263(3):539-  
815 49. doi:10.1007/s00415-015-8014-y
- 816 69. Werner CJ, Dogan I, Sass C, et al. Altered resting-state connectivity in Huntington's  
817 disease. *Hum Brain Mapp*. Jun 2014;35(6):2582-93. doi:10.1002/hbm.22351

- 818 70. Sanchez-Castaneda C, de Pasquale F, Caravasso CF, et al. Resting-state connectivity  
819 and modulated somatomotor and default-mode networks in Huntington disease. *CNS*  
820 *Neurosci Ther.* Jun 2017;23(6):488-497. doi:10.1111/cns.12701
- 821 71. Hintiryan H, Foster NN, Bowman I, et al. The mouse cortico-striatal projectome. *Nat*  
822 *Neurosci.* Aug 2016;19(8):1100-14. doi:10.1038/nn.4332
- 823 72. Gehrlach DA, Weiland C, Gaitanos TN, et al. A whole-brain connectivity map of  
824 mouse insular cortex. *Elife.* Sep 17 2020;9doi:10.7554/eLife.55585
- 825 73. Menon V, Uddin LQ. Saliency, switching, attention and control: a network model of  
826 insula function. *Brain Struct Funct.* Jun 2010;214(5-6):655-67. doi:10.1007/s00429-010-  
827 0262-0
- 828 74. Nordin S, Paulsen JS, Murphy C. Sensory- and memory-mediated olfactory  
829 dysfunction in Huntington's disease. *J Int Neuropsychol Soc.* May 1995;1(3):281-90.  
830 doi:10.1017/s1355617700000278
- 831 75. Hamilton JM, Murphy C, Paulsen JS. Odor detection, learning, and memory in  
832 Huntington's disease. *J Int Neuropsychol Soc.* Nov 1999;5(7):609-15.  
833 doi:10.1017/s1355617799577035
- 834 76. Lazic SE, Goodman AO, Grote HE, et al. Olfactory abnormalities in Huntington's  
835 disease: decreased plasticity in the primary olfactory cortex of R6/1 transgenic mice and  
836 reduced olfactory discrimination in patients. *Brain Res.* Jun 2 2007;1151:219-26.  
837 doi:10.1016/j.brainres.2007.03.018
- 838 77. Ferris CF, Kulkarni P, Toddes S, Yee J, Kenkel W, Nedelman M. Studies on the  
839 Q175 Knock-in Model of Huntington's Disease Using Functional Imaging in Awake Mice:  
840 Evidence of Olfactory Dysfunction. *Front Neurol.* 2014;5:94. doi:10.3389/fneur.2014.00094
- 841 78. Betzel RF, Byrge L, He Y, Goni J, Zuo XN, Sporns O. Changes in structural and  
842 functional connectivity among resting-state networks across the human lifespan. *Neuroimage.*  
843 Nov 15 2014;102 Pt 2:345-57. doi:10.1016/j.neuroimage.2014.07.067
- 844 79. Bo J, Lee CM, Kwak Y, et al. Lifespan differences in cortico-striatal resting state  
845 connectivity. *Brain Connect.* Apr 2014;4(3):166-80. doi:10.1089/brain.2013.0155
- 846 80. Whitesell JD, Liska A, Coletta L, et al. Regional, Layer, and Cell-Type-Specific  
847 Connectivity of the Mouse Default Mode Network. *Neuron.* Feb 3 2021;109(3):545-559 e8.  
848 doi:10.1016/j.neuron.2020.11.011
- 849 81. Fox MD, Snyder AZ, Vincent JL, Corbetta M, Van Essen DC, Raichle ME. The  
850 human brain is intrinsically organized into dynamic, anticorrelated functional networks. *Proc*  
851 *Natl Acad Sci U S A.* Jul 5 2005;102(27):9673-8. doi:10.1073/pnas.0504136102
- 852 82. Estrada-Sanchez AM, Burroughs CL, Cavaliere S, et al. Cortical efferents lacking  
853 mutant huntingtin improve striatal neuronal activity and behavior in a conditional mouse  
854 model of Huntington's disease. *J Neurosci.* Mar 11 2015;35(10):4440-51.  
855 doi:10.1523/JNEUROSCI.2812-14.2015
- 856 83. Fisher SP, Schwartz MD, Wurts-Black S, et al. Quantitative Electroencephalographic  
857 Analysis Provides an Early-Stage Indicator of Disease Onset and Progression in the zQ175  
858 Knock-In Mouse Model of Huntington's Disease. *Sleep.* Feb 1 2016;39(2):379-91.  
859 doi:10.5665/sleep.5448
- 860 84. Belloy ME, Shah D, Abbas A, et al. Quasi-Periodic Patterns of Neural Activity  
861 improve Classification of Alzheimer's Disease in Mice. *Sci Rep.* Jul 3 2018;8(1):10024.  
862 doi:10.1038/s41598-018-28237-9
- 863 85. Adhikari MH, Belloy ME, Van der Linden A, Keliris GA, Verhoye M. Resting-State  
864 Co-activation Patterns as Promising Candidates for Prediction of Alzheimer's Disease in  
865 Aged Mice. *Front Neural Circuits.* 2020;14:612529. doi:10.3389/fncir.2020.612529
- 866 86. Cowan CM, Raymond LA. Selective neuronal degeneration in Huntington's disease.  
867 *Curr Top Dev Biol.* 2006;75:25-71. doi:10.1016/S0070-2153(06)75002-5



- 868 87. Heikkinen T, Lehtimäki K, Vartiainen N, et al. Characterization of  
869 neurophysiological and behavioral changes, MRI brain volumetry and 1H MRS in zQ175  
870 knock-in mouse model of Huntington's disease. *PLoS One*. 2012;7(12):e50717.  
871 doi:10.1371/journal.pone.0050717
- 872 88. Goodliffe JW, Song H, Rubakovic A, et al. Differential changes to D1 and D2  
873 medium spiny neurons in the 12-month-old Q175<sup>+/-</sup> mouse model of Huntington's Disease.  
874 *PLoS One*. 2018;13(8):e0200626. doi:10.1371/journal.pone.0200626
- 875 89. Drew PJ. Vascular and neural basis of the BOLD signal. *Curr Opin Neurobiol*. Oct  
876 2019;58:61-69. doi:10.1016/j.conb.2019.06.004
- 877 90. Attwell D, Buchan AM, Chrapak S, Lauritzen M, Macvicar BA, Newman EA. Glial  
878 and neuronal control of brain blood flow. *Nature*. Nov 11 2010;468(7321):232-43.  
879 doi:10.1038/nature09613

880

881
